# Supplementary material for: The effect of preinjury warfarin use on mortality rates in trauma patients: a European multicentre study
Source: HighWire-hosted journal article supplement (doi:10.1136/emermed-2014-203959), 2015-02-05
Supplement: emermed-2014-203959supp1.pdf [file emermed-2014-203959supp1.pdf]

## Subgroup analysis of matched patients: 2009 - 2013

|                               |                          |      | Warfarin         |                  |
|-------------------------------|--------------------------|------|------------------|------------------|
|                               |                          |      | No               | Yes              |
| Total                         |                          |      | 448              | 448              |
| Age                           | Median (IQR)             |      | 80.9 (71.7-85.9) | 80.5 (71.3-85.8) |
| ISS                           | Median (IQR)             |      | 10 (9-19)        | 10 (9-19)        |
| GCS                           | Median (IQR)             |      | 15 (15 - 15)     | 15 (15 - 15)     |
| GCS grouped                   | GCS 3 - 8                | n(%) | 17 (3.8%)        | 17 (3.8%)        |
|                               | GCS 9 - 14               | n(%) | 91 (20.3%)       | 90 (20.1%)       |
|                               | GCS 15                   | n(%) | 340 (75.9%)      | 341 (76.1%)      |
| Head injury                   | No                       | n(%) | 292 (65.2%)      | 278 (62.1%)      |
|                               | Yes                      | n(%) | 156 (34.8%)      | 170 (37.9%)      |
| Treated in Neurocentre        | No                       | n(%) | 291 (65%)        | 178 (39.7%)      |
|                               | Yes                      | n(%) | 157 (35%)        | 270 (60.3%)      |
| Pre Exisitng medical conditon | No PMC                   | n(%) | 5 (1.1%)         | 5 (1.1%)         |
|                               | Non-Warfarin related PMC | n(%) | 249 (55.6%)      | 249 (55.6%)      |
|                               | Warfarin related PMC     | n(%) | 194 (43.3%)      | 194 (43.3%)      |
| Outcome                       | Alive                    | n(%) | 375 (83.7%)      | 349 (77.9%)      |
|                               | Dead                     | n(%) | 73 (16.3%)       | 99 (22.1%)       |
